# Supplementary material
Source: PubMed Central journal article supplement (PMC7384796)
Supplement: ehp6047.smcontents.508.pdf [file ehp6047.smcontents.508.pdf]

**Note to readers with disabilities:** *EHP* strives to ensure that all journal content is accessible to all readers. However, some figures and Supplemental Material published in *EHP* articles may not conform to [508 standards](#) due to the complexity of the information being presented. If you need assistance accessing journal content, please contact [ehp508@niehs.nih.gov](mailto:ehp508@niehs.nih.gov). Our staff will work with you to assess and meet your accessibility needs within 3 working days.

### **Supplemental Material**

#### **Phthalate and Bisphenol Exposure during Pregnancy and Offspring Nonverbal IQ**

Michiel A. van den Dries, Mònica Guxens, Suzanne Spaan, Kelly K. Ferguson, Elise Philips, Susana Santos, Vincent W.V. Jaddoe, Akhgar Ghassabian, Leonardo Trasande, Henning Tiemeier, and Anjoeka Pronk

#### **Table of Contents**

**Table S1.** Variables used in logistic regression model to calculate inverse probability of attrition weights.

**Table S2.** Descriptive statistics of urinary phthalate metabolite concentrations in ng/ml across pregnancy measured in 1,282 women.

**Table S3.** Descriptive statistics of urinary bisphenol concentrations in ng/ml across pregnancy measured in 1,282 women.

**Table S4.** Intra-class correlations between log<sub>10</sub> transformed phthalate and bisphenol concentrations across gestational urinary collection phases.

**Table S5.** Adjusted associations between maternal urine phthalate metabolite and bisphenol concentrations in ug/g creatinine, by timing of pregnancy and sex (n=1,282).

**Table S6.** Difference in child nonverbal IQ score at age six years per log<sub>10</sub> increase in maternal urinary phthalate and bisphenol concentrations in ng/ml with creatinine added as a separate covariate (n=1,282).

**Table S7.** Difference in child nonverbal IQ score at age six years per log<sub>10</sub> increase in individual urinary biomarkers (ug/g creatinine) of phthalate and bisphenol exposure (n=1,282).

**Table S8.** Inverse probability weighted association between log<sub>10</sub> transformed maternal urine phthalate and bisphenol metabolite concentrations in ug/g creatinine and child nonverbal IQ score at age six years (n=1,282).

**Table S9.** Adjusted association between log<sub>10</sub> transformed maternal urinary phthalate metabolite and bisphenol concentration in ug/g creatinine with additional adjustment for the maternal intake of fruit, vegetables and folic acid (n=1,282).

**Figure S1.** Directed acyclic graph of the prenatal phthalates and bisphenol exposure and child nonverbal IQ association.

**Figure S2.** Restricted cubic splines (and 95% confidence intervals) of adjusted child nonverbal IQ scores and (untransformed) grouped phthalate metabolite concentrations.
